# Supplementary material
Source: PubMed Central journal article supplement (PMC3154418)
Supplement: cc1012_1998SD1.pdf [file cc1012_1998SD1.pdf]

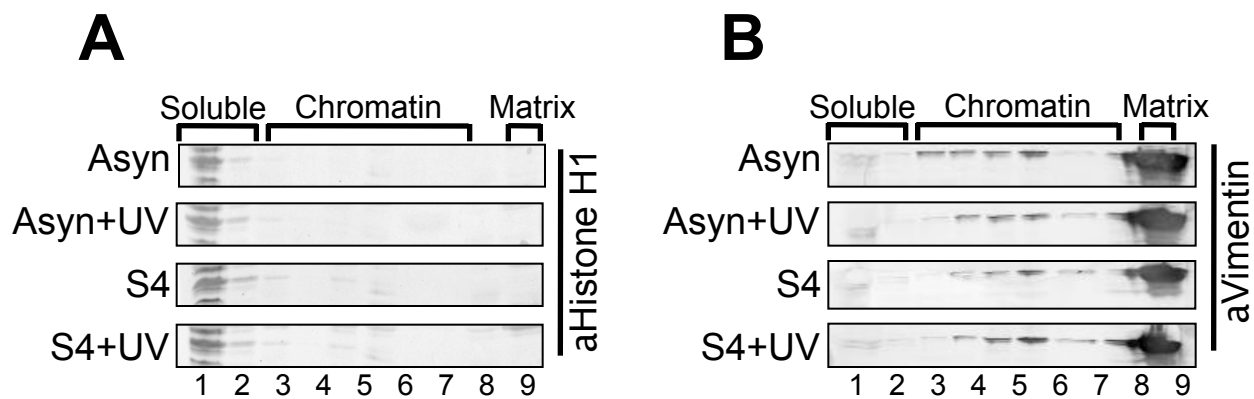

**Supplemental Figure 1.** Association of Histone H1 with soluble fraction and of Vimentin with the nuclear matrix. Human HCA2-hTERT fibroblasts either asynchronously growing or in mid-S-phase (S4) and either mock or UV-damaged (30 J/m<sup>2</sup>), were fractionated as described in materials and methods. The lane numbers correspond to the fraction numbers. Western analysis was performed for (A) Histone H1 and for (B) Vimentin.

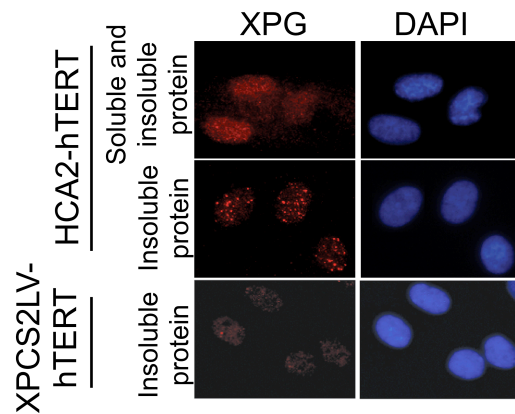

**Supplemental Figure 2.** XPG immunostaining of total protein versus insoluble protein of fixed normal or XP-G/CS cells. hTERT immortalized HCA2 fibroblasts were treated with HU in S-phase, then fixed and permeabilized (top panel), or permeabilized and then fixed (middle panel) prior to immunostaining with rabbit anti-XPG 97714 (red) antibody. Discrete XPG foci can only be visualized when soluble protein is extracted prior to fixation. XPG immunostaining is absent in XP-G/CS cells (bottom panel). hTERT immortalized human XPCS2LV fibroblasts from a patient with severely truncating mutations in both *XPG* alleles, in which no XPG protein is detectable by western analysis, were synchronized in mid S-phase and immunostained with rabbit anti-XPG 97714 (red). Nuclei were stained blue with DAPI.

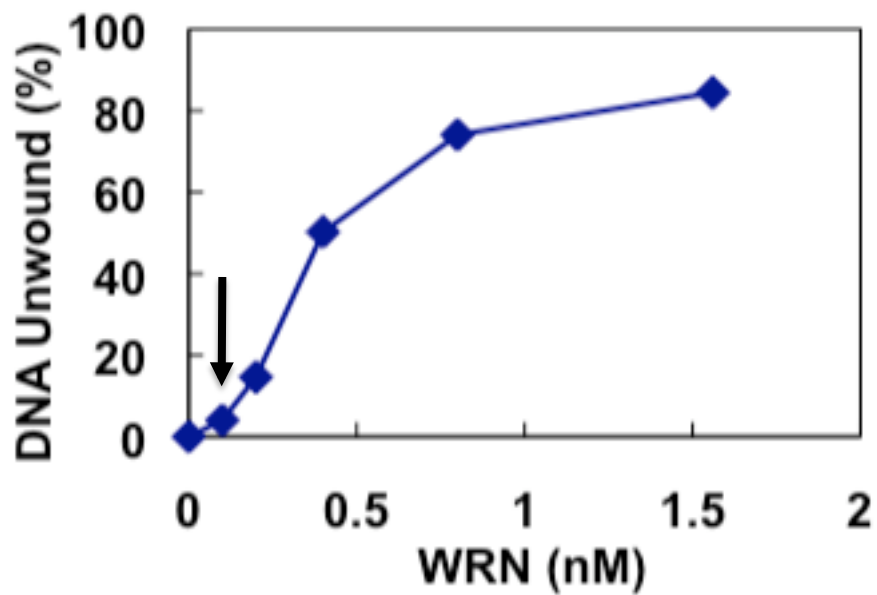

**Supplemental Figure 3.** Titration of WRN helicase activity. WRN protein (0, 0.1, 0.2, 0.4, 0.8, 1.6 nM) was incubated with 0.5 nM DNA substrate for 30 min at 37°C. DNA unwound (%) was quantified and plotted vs. protein concentration. The arrow indicates the concentration of WRN (0.1 nM) selected to assay for stimulation by XPG.
